# Supplementary material for: Evaluation of Northern Hemisphere snow water equivalent in CMIP6 models with satellite-based SnowCCI data during 1982–2014
Source: Copernicus journal article supplement (doi:10.5194/tc-2021-195), 2021-07-14
Supplement: Supplementary file 1 [file tc-2021-195-supplement.pdf]

# Mean SWE, P and T in April 1982-2014

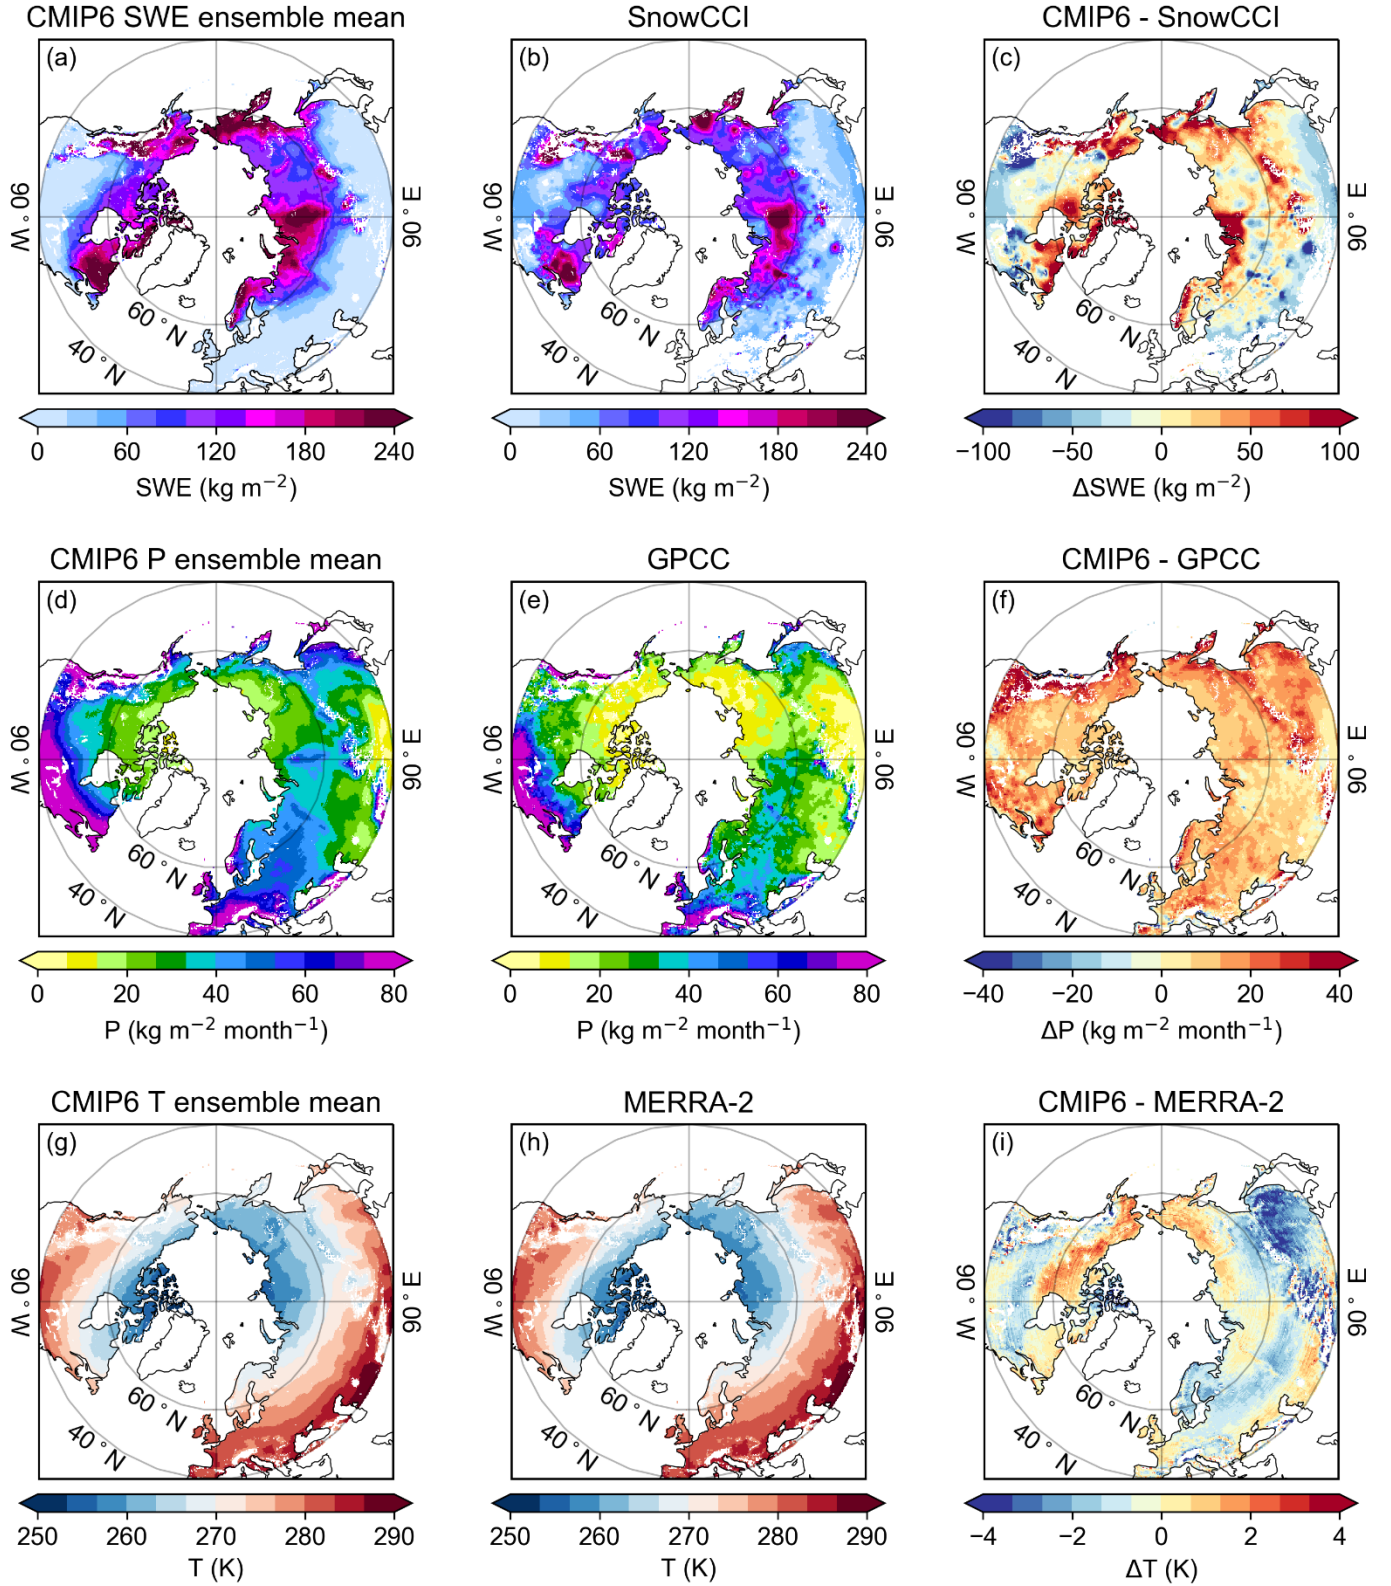

**Figure S1** (top) Mean SWE in April for CMIP6 multi-model ensemble mean, SnowCCI and the difference CMIP6-SnowCCI for the period 1982-2014. (middle) Mean P in April for CMIP6 multi-model ensemble mean, GPCC and the difference CMIP6-GPCC for the period 1982-2014. (bottom) Mean T in April for CMIP6 multi-model ensemble mean, MERRA-2 and the difference CMIP6-MERRA-2 for the period 1982-2014.

Winter 1982-2014

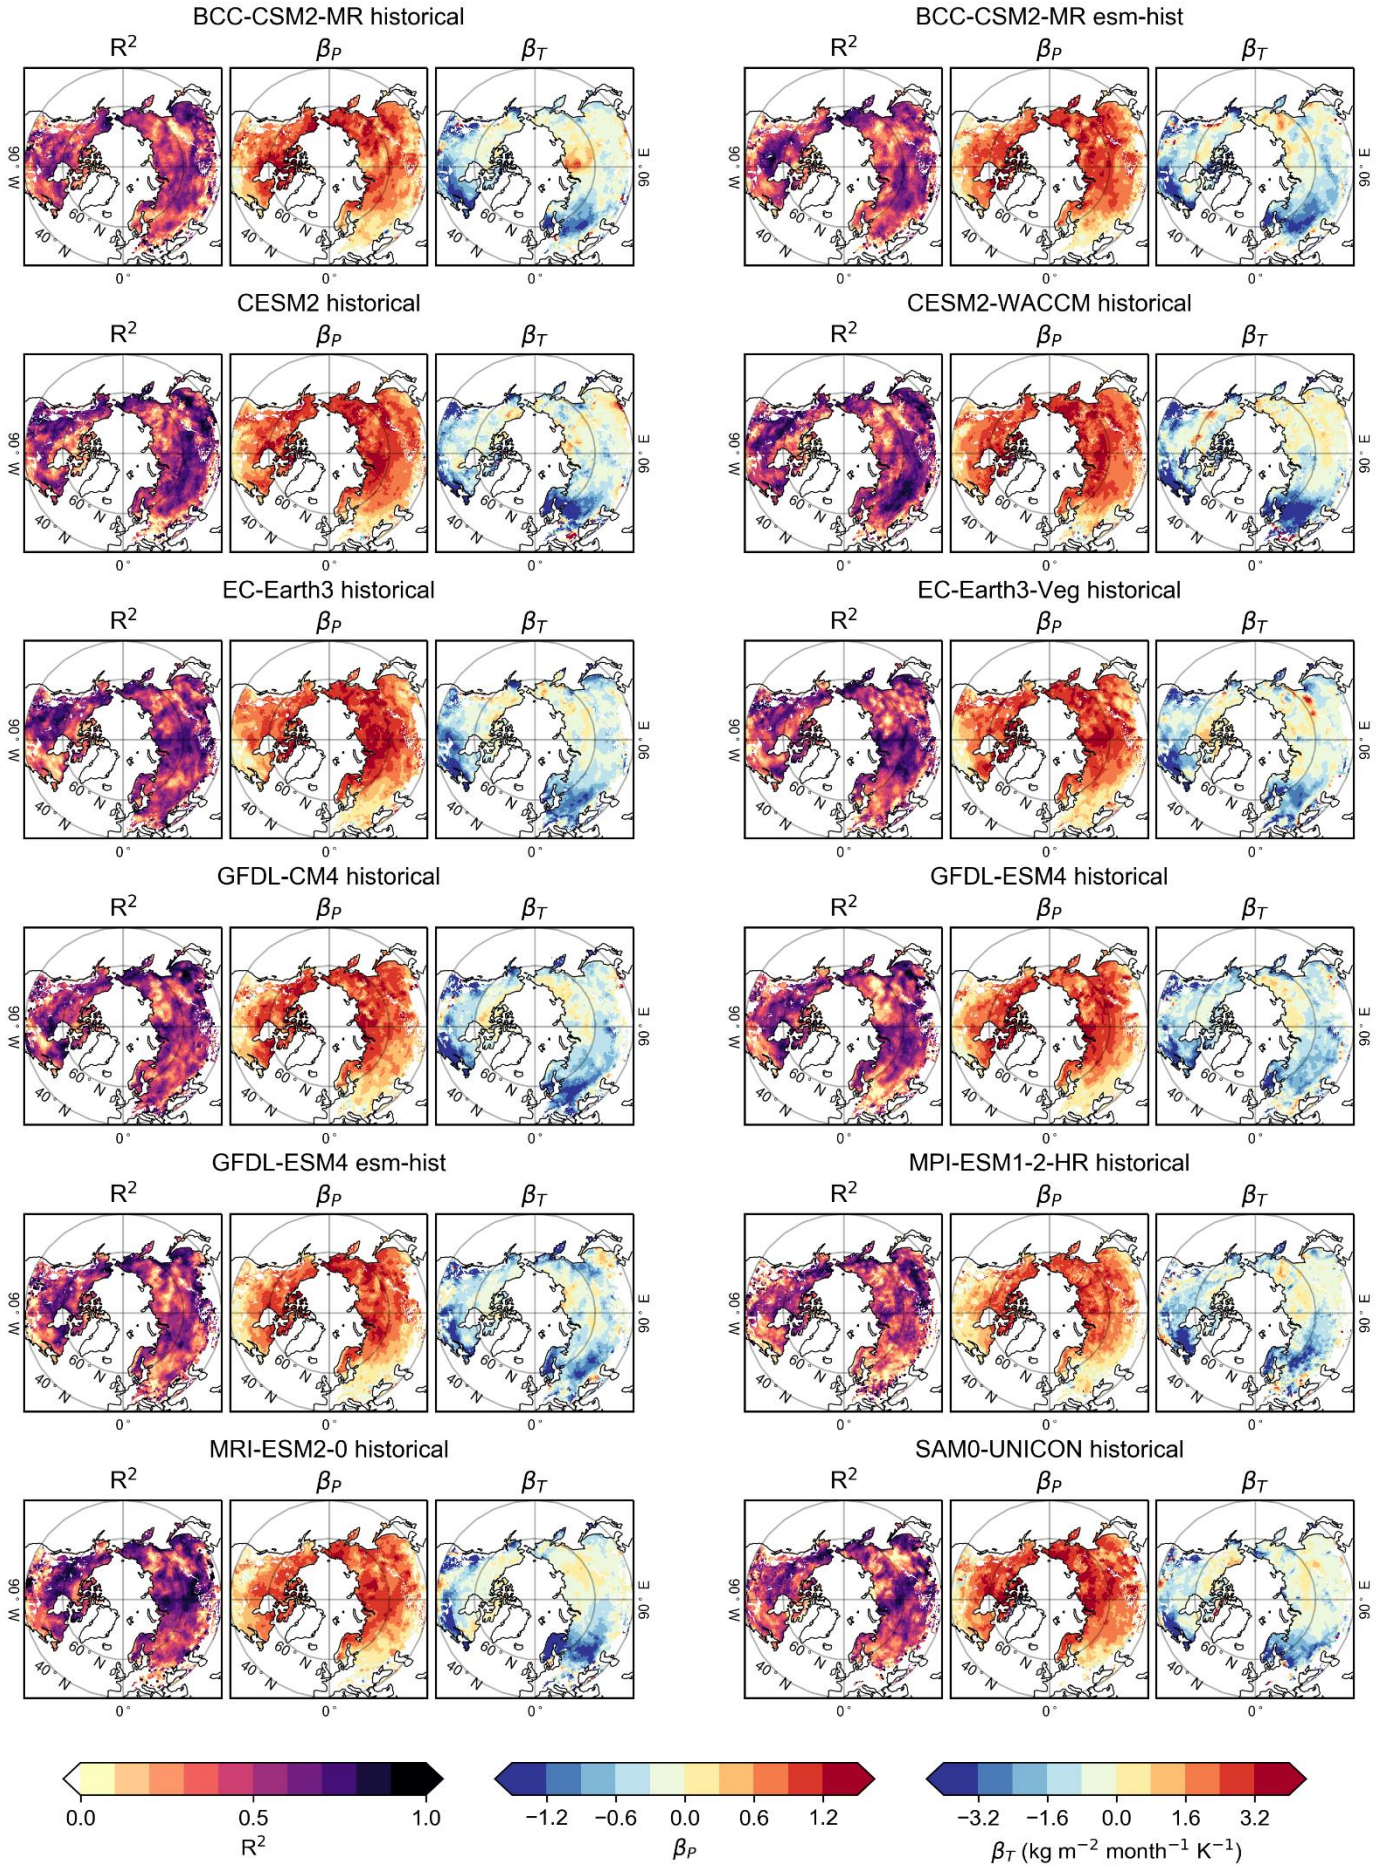

**Figure S2.** Linear regression parameters  $R^2$ ,  $\beta_P$ , and  $\beta_T$  in winter 1982-2014.

Winter 1982-1991

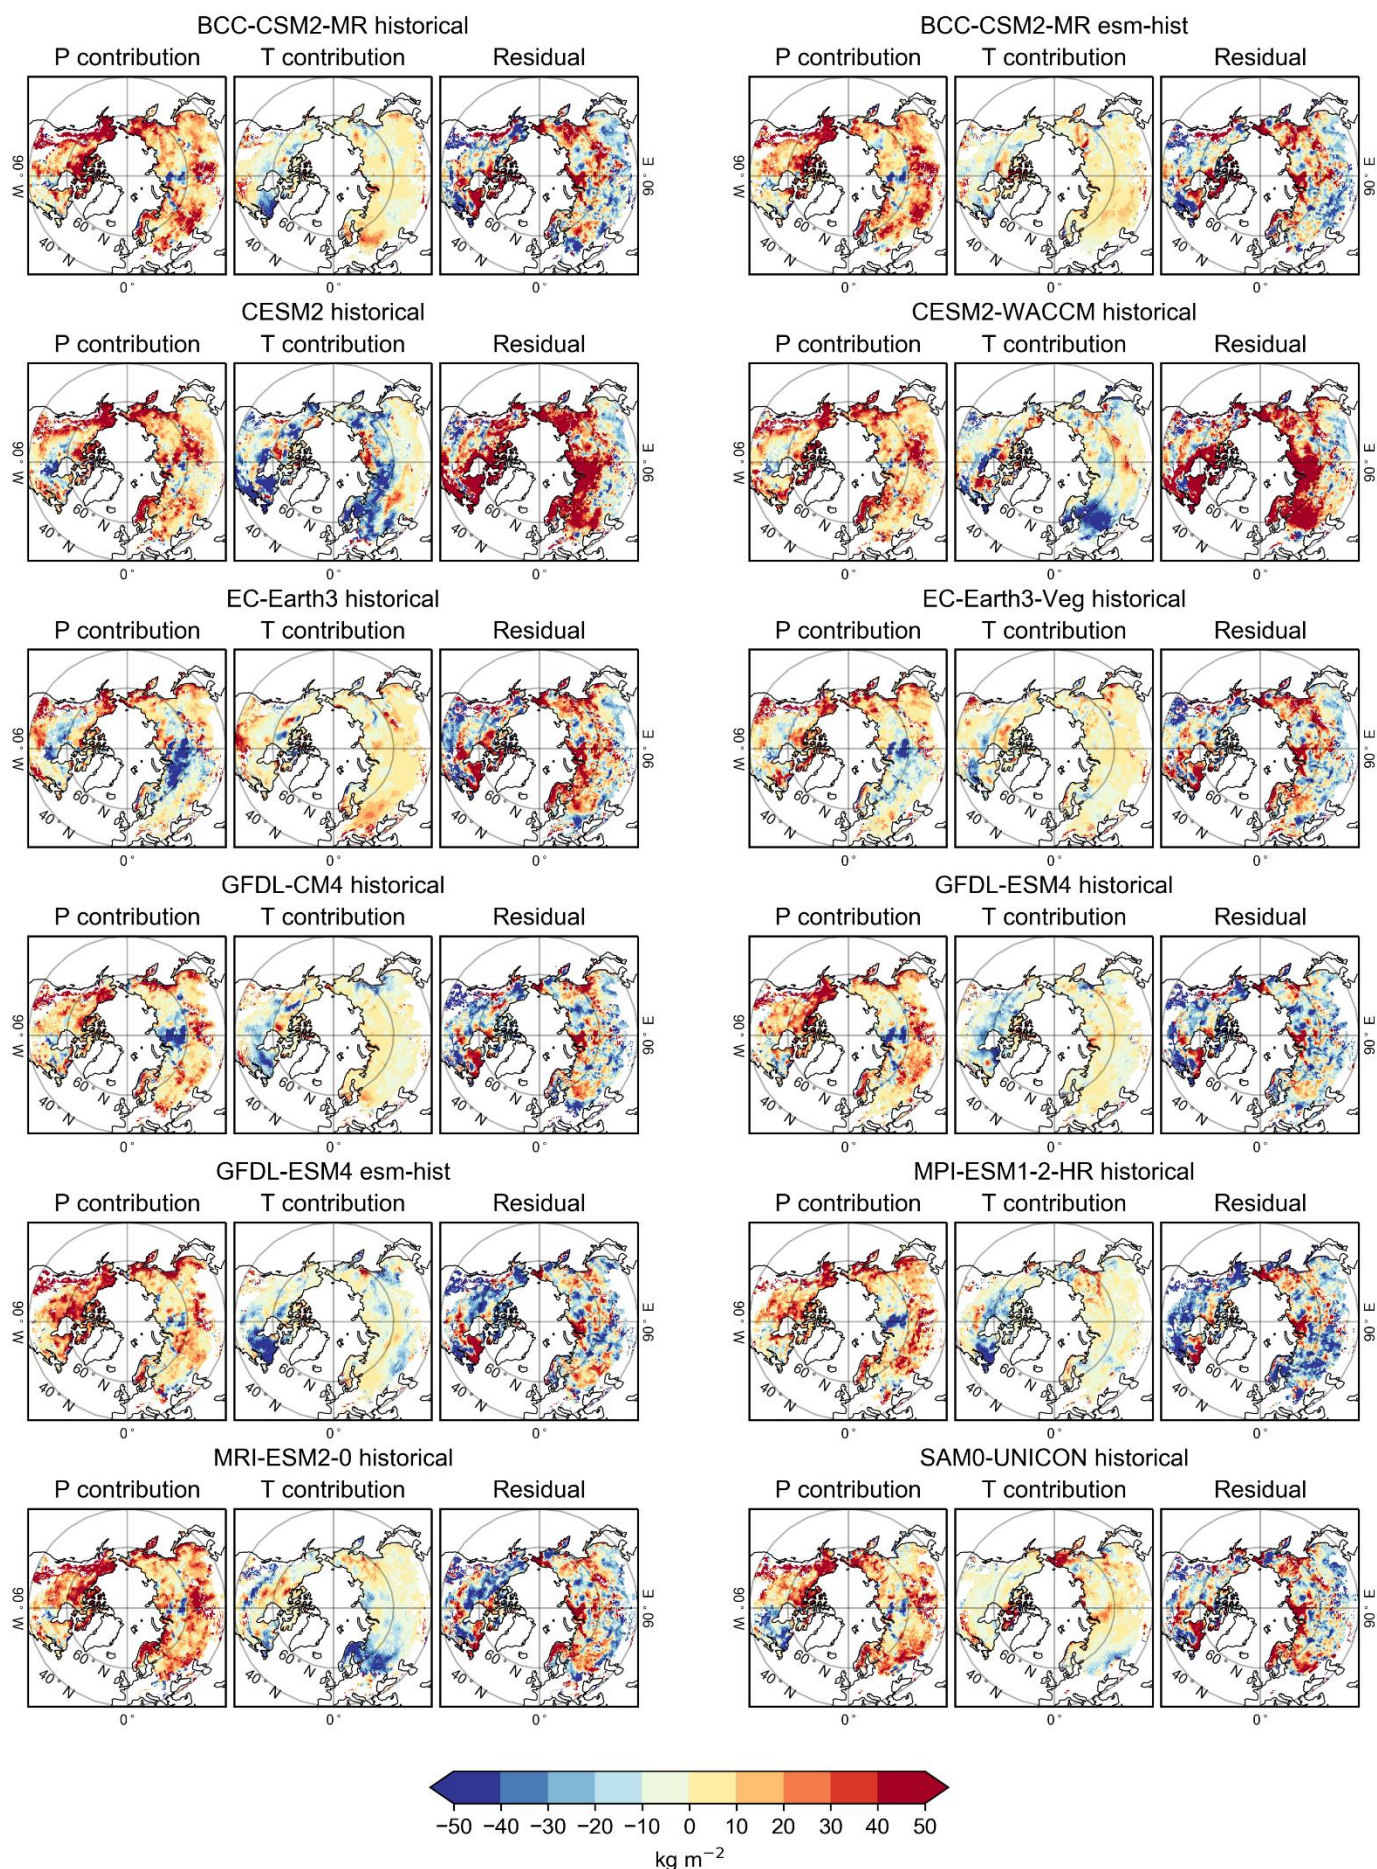

**Figure S3.** Spatial distribution of P contribution, T contribution and constant for each model in winter 1982-1991.

Winter 1992-2001

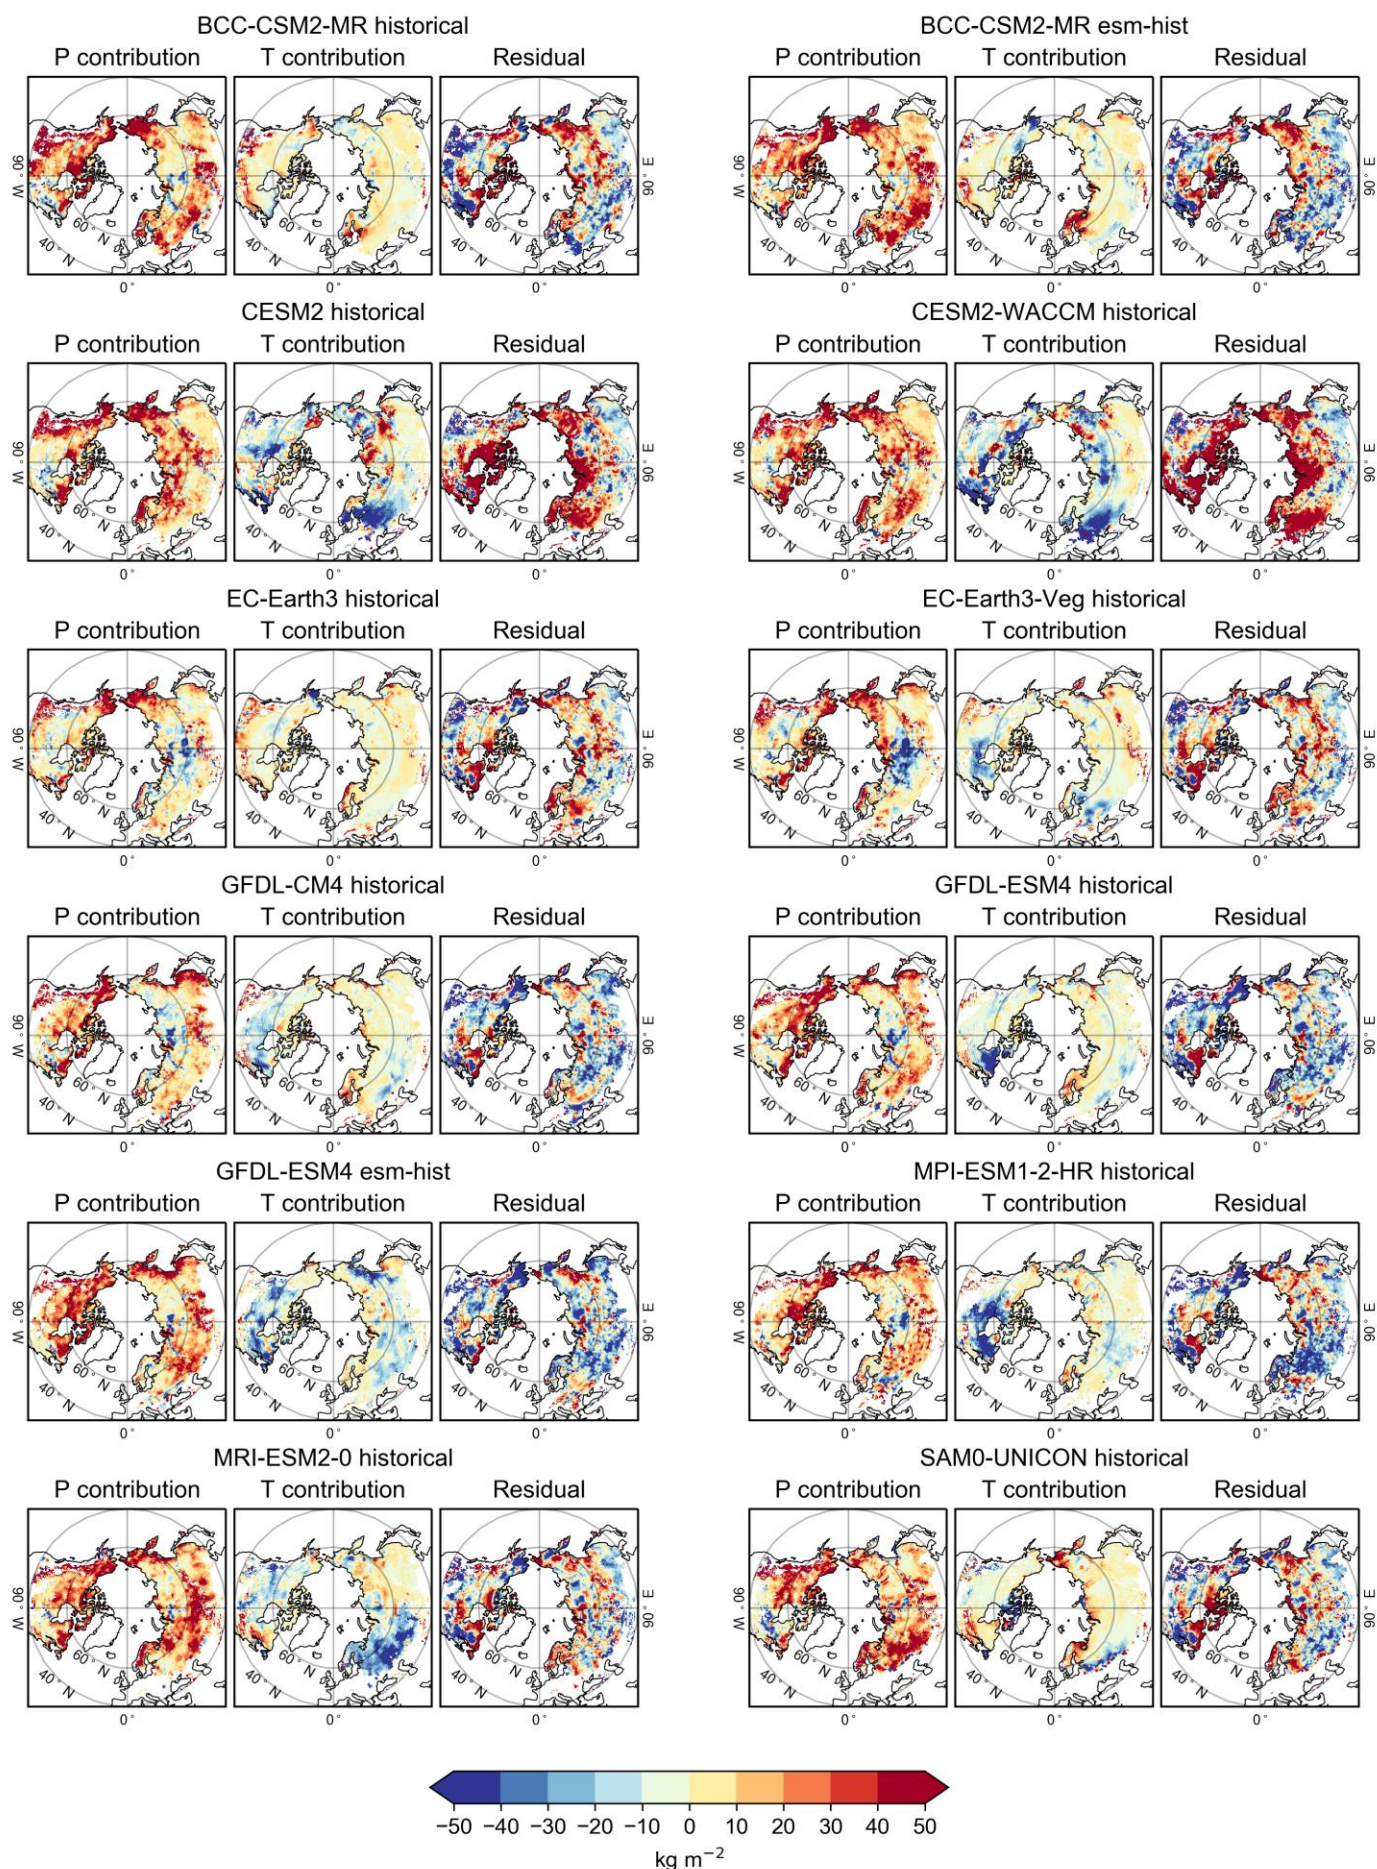

**Figure S4.** Spatial distribution of P contribution, T contribution and constant for each model in winter 1992-2001.

Winter 2002-2014

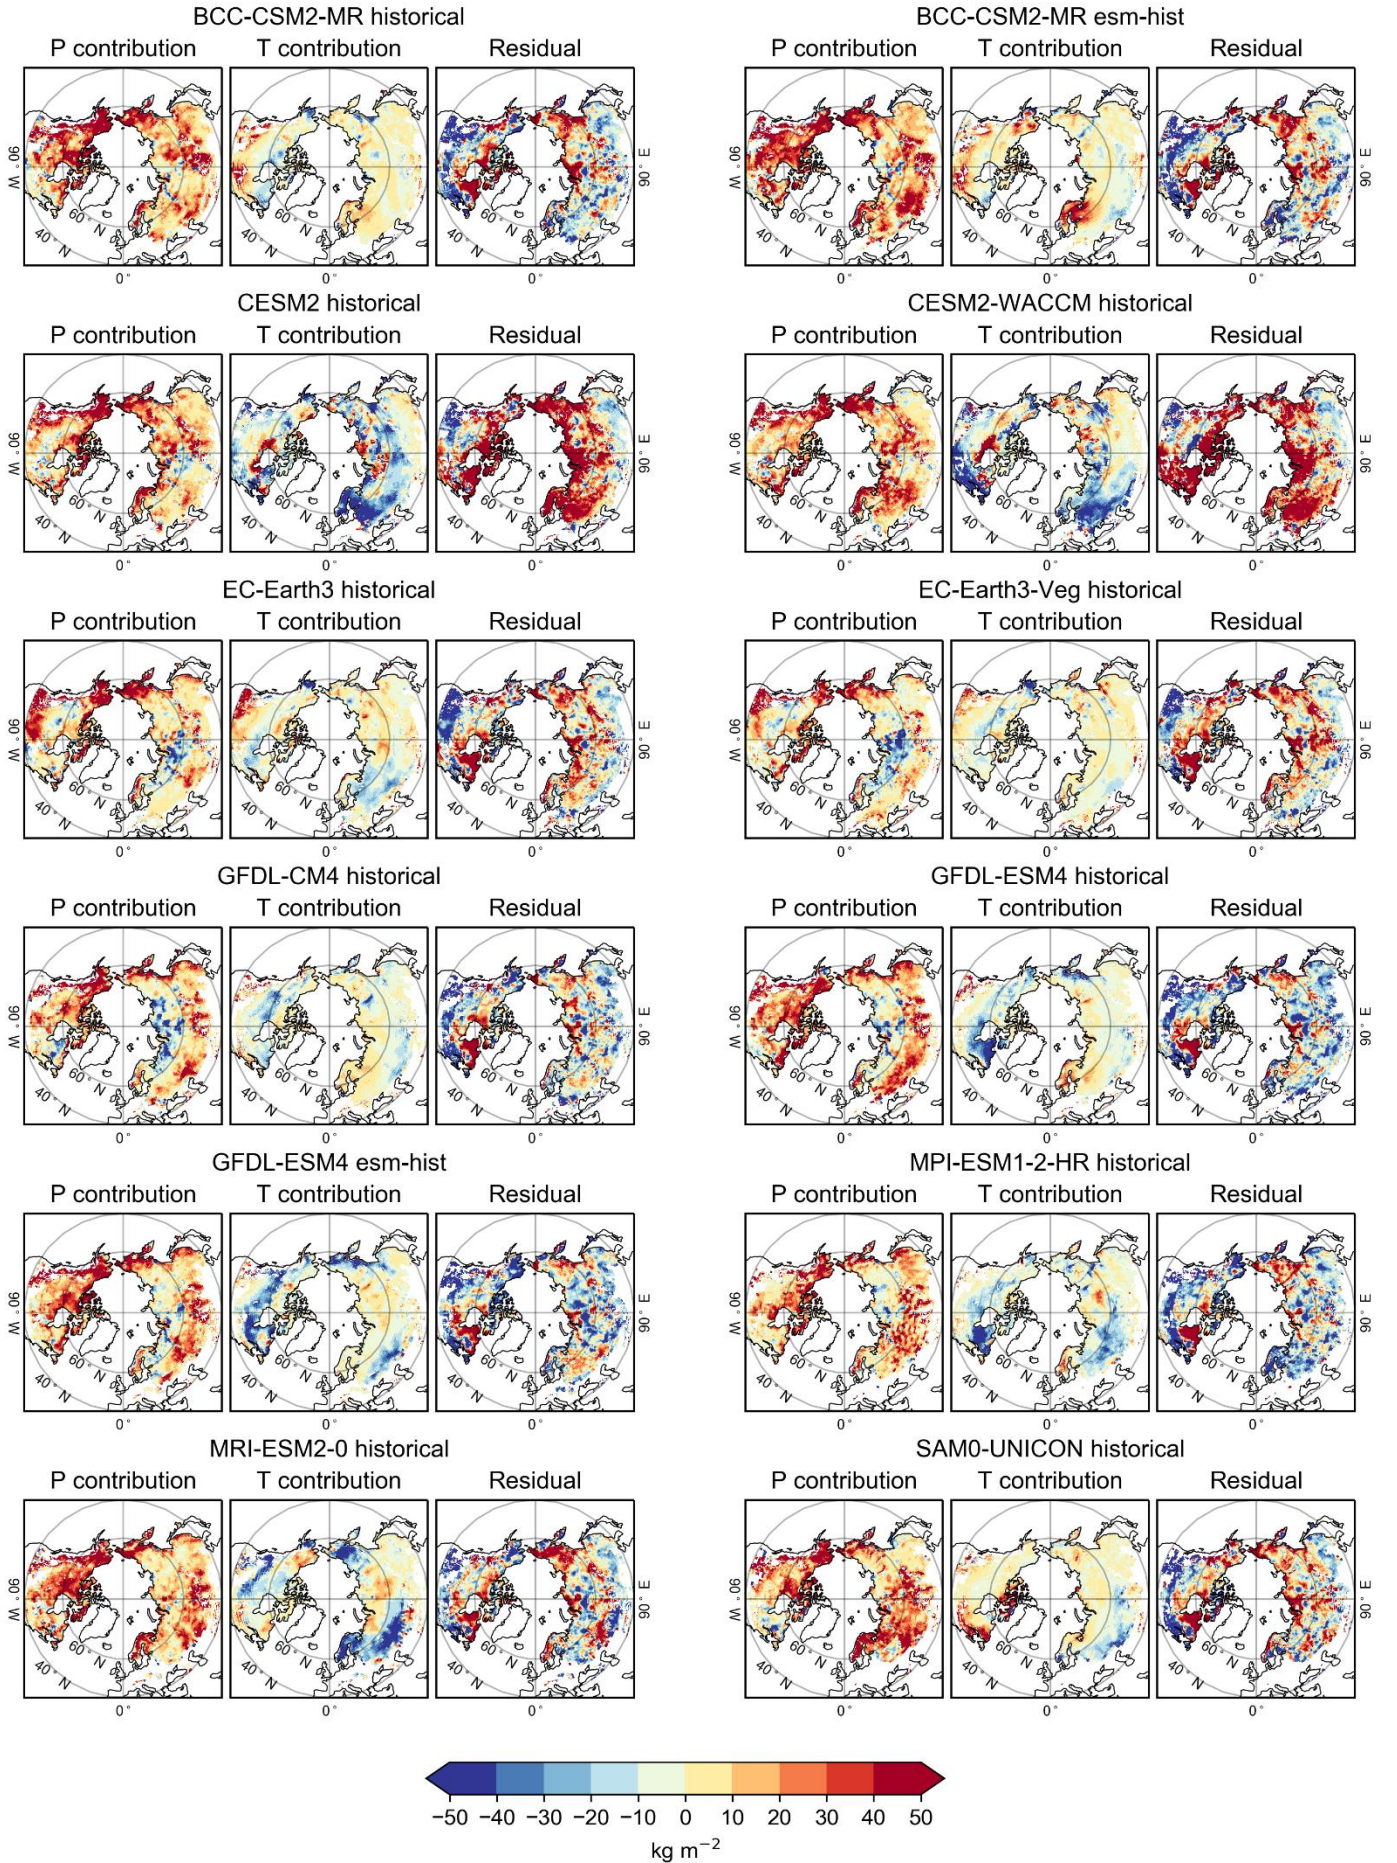

**Figure S5.** Spatial distribution of P contribution, T contribution and constant for each model in winter 2002-2014.



Spring 1982-1991

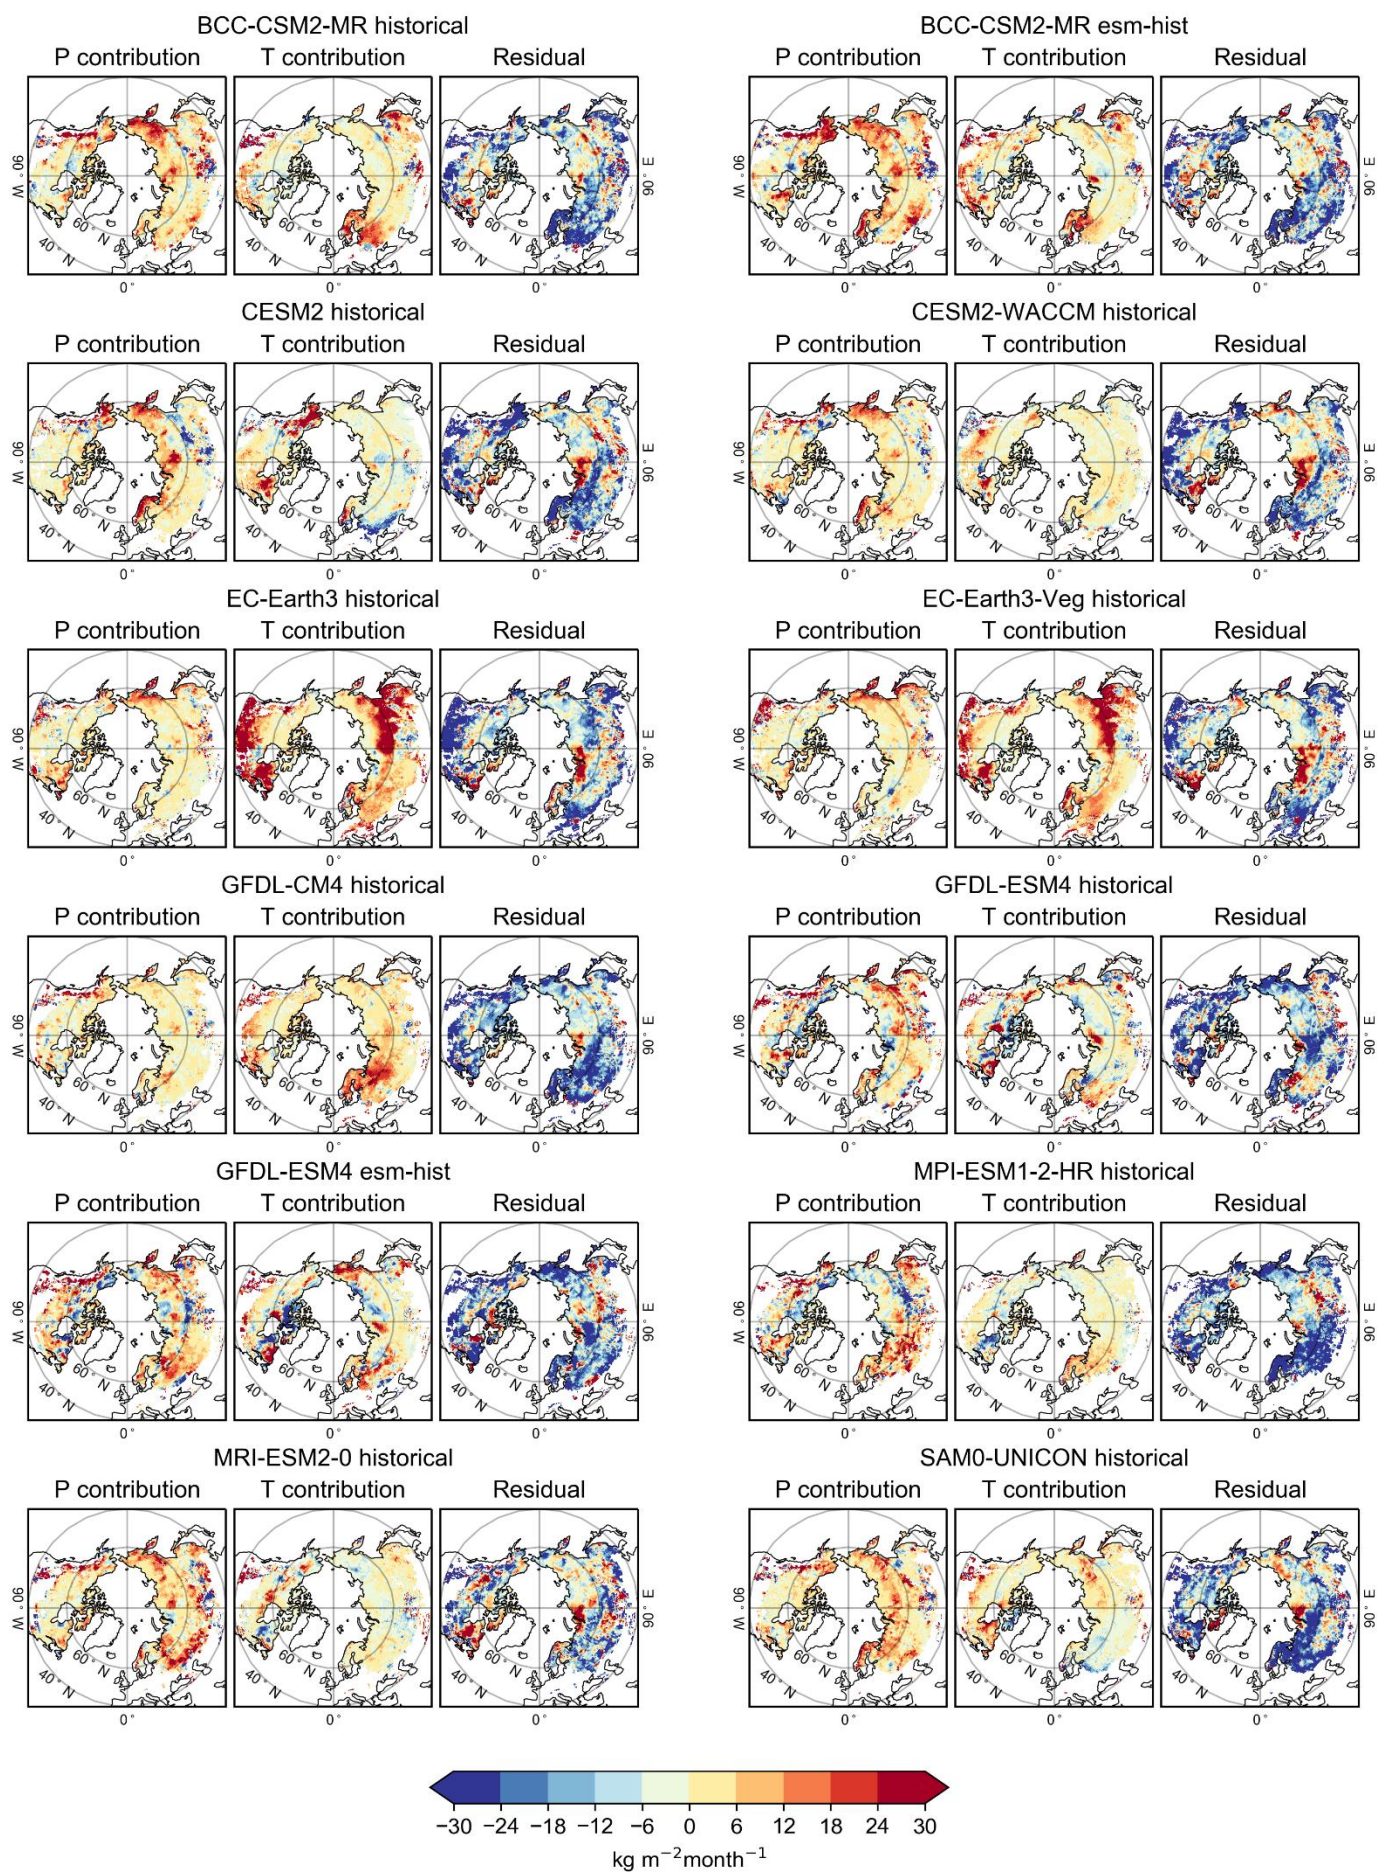

**Figure S7.** Spatial distribution of P contribution, T contribution and constant for each model in spring 1982-1991.

Spring 1992-2001

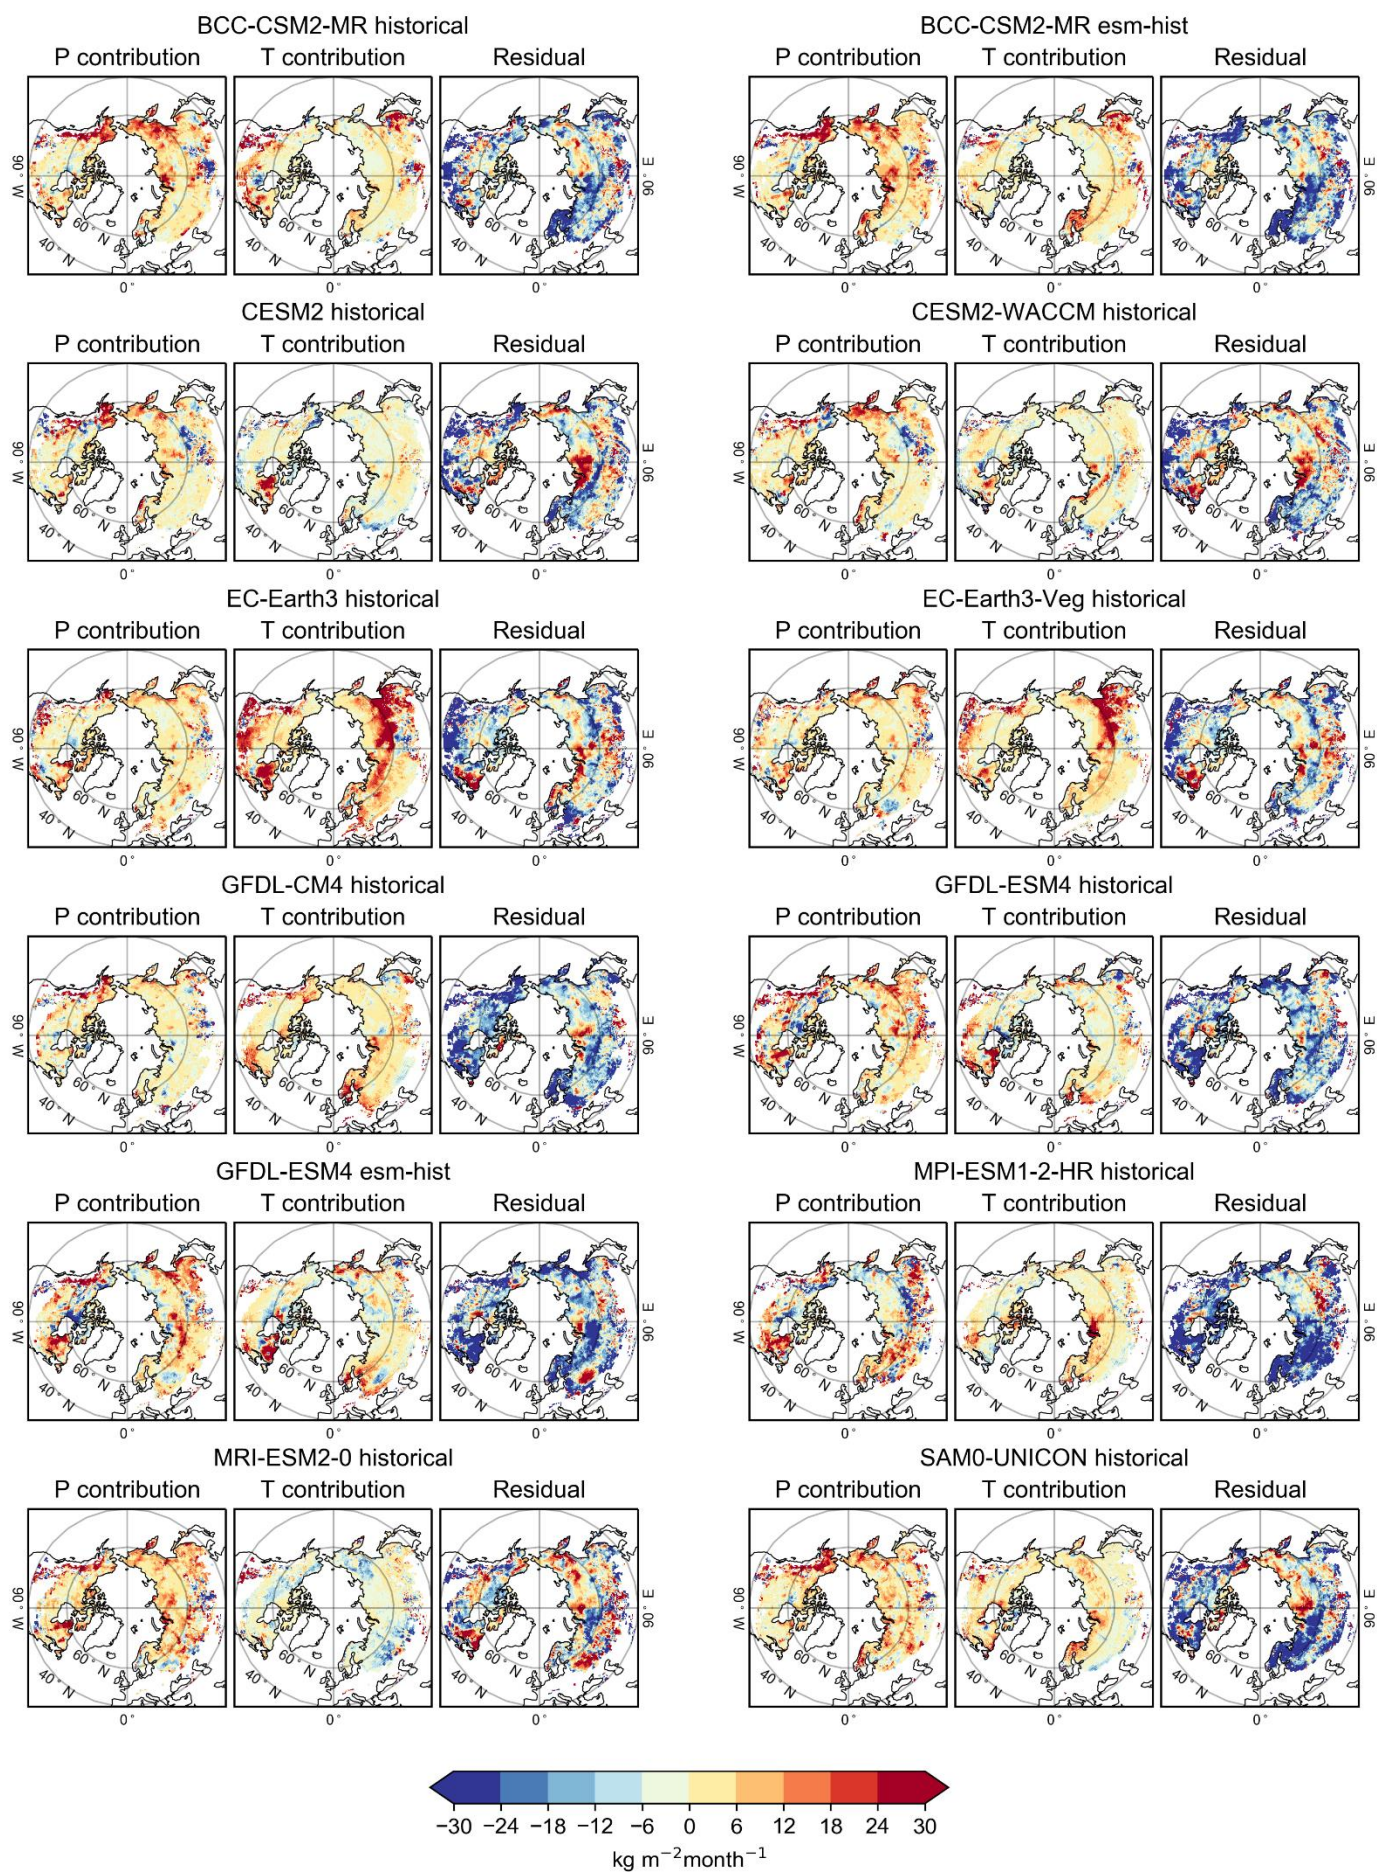

**Figure S8.** Spatial distribution of P contribution, T contribution and constant for each model in spring 1992-2001.

Spring 2002-2014

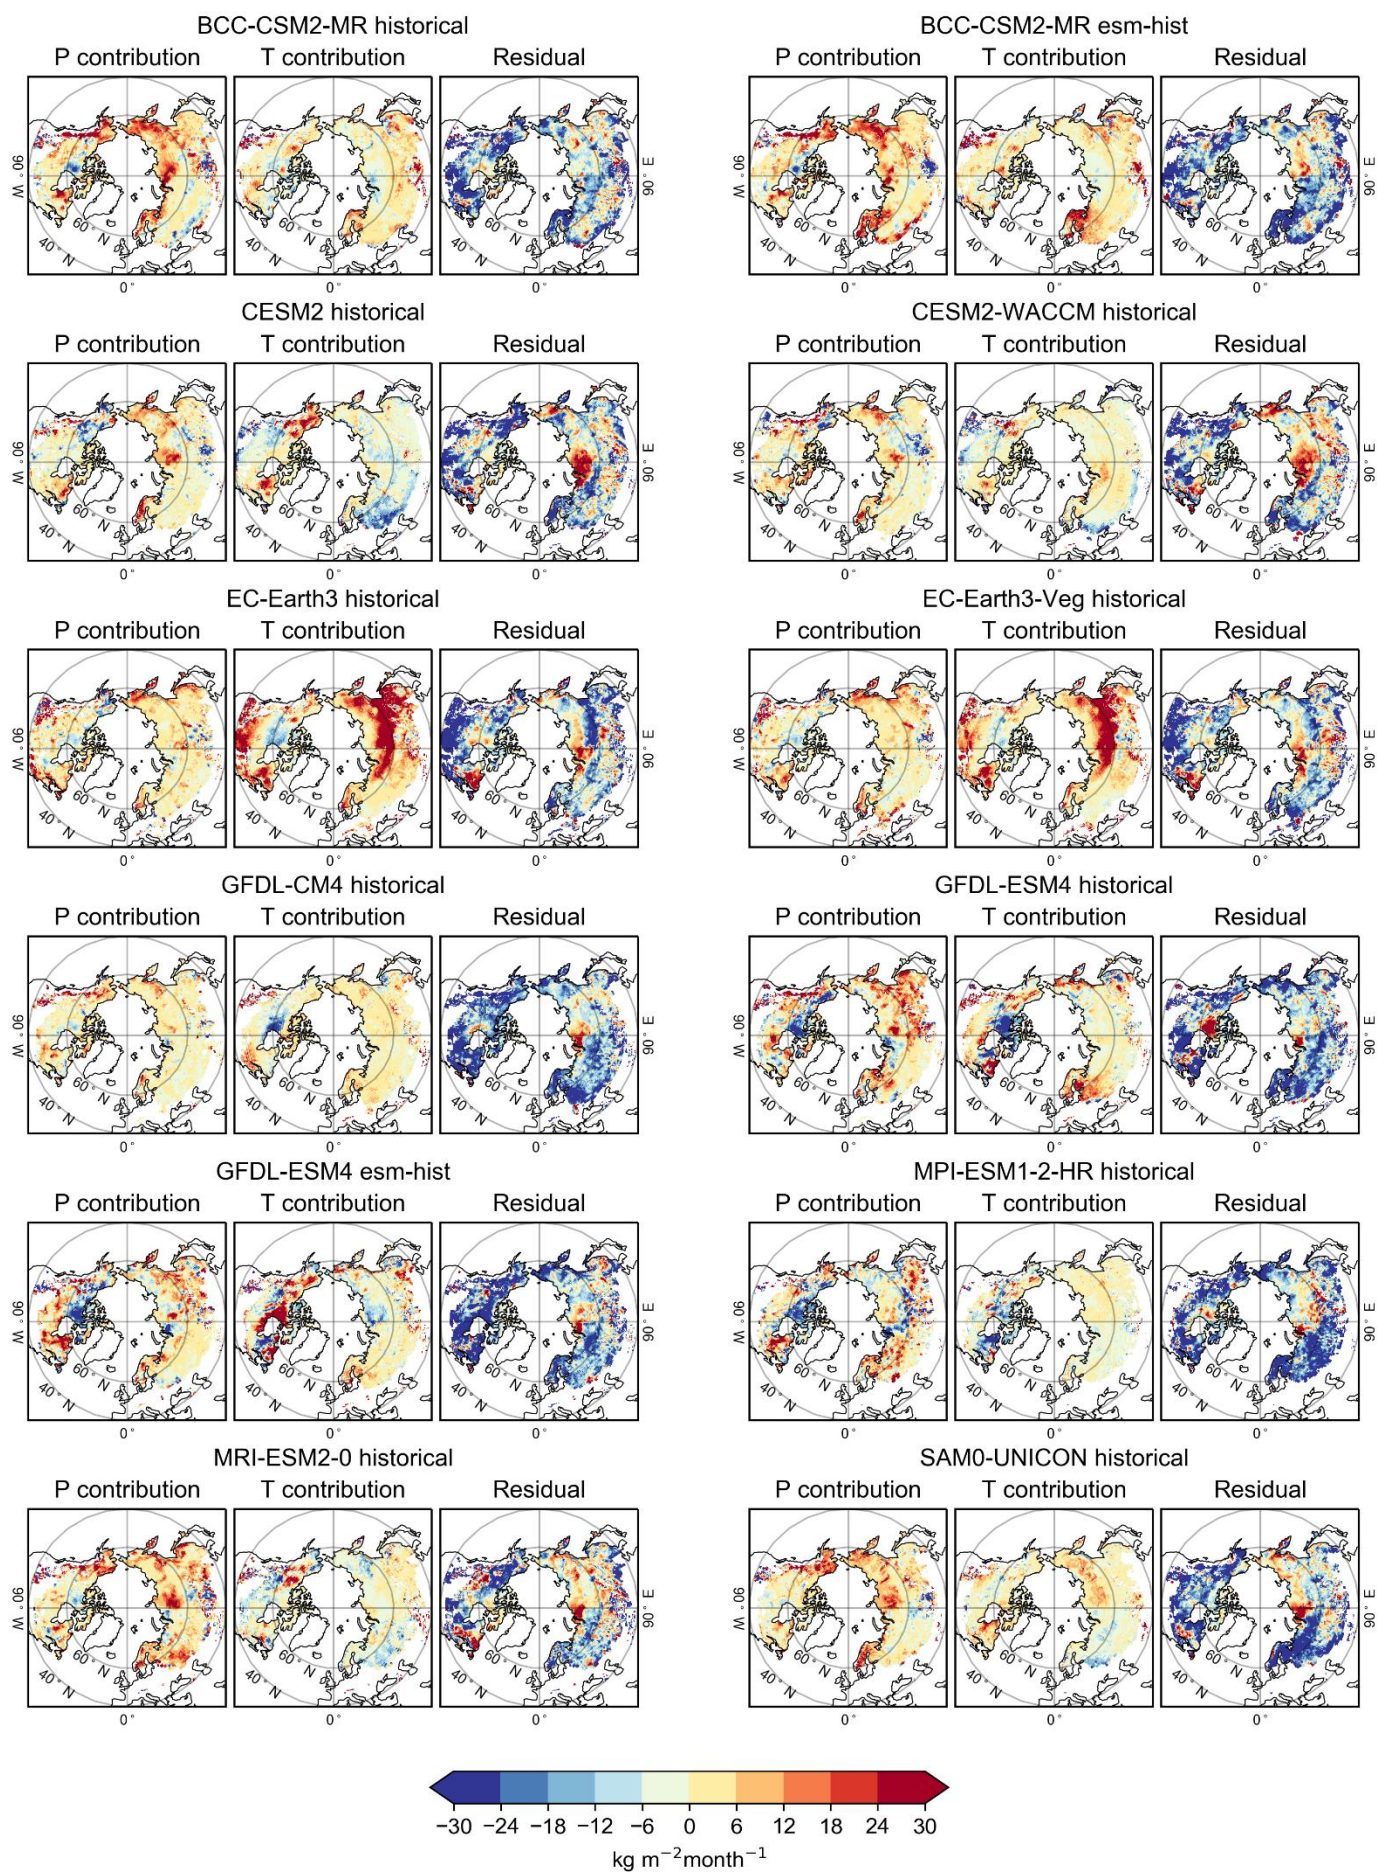

**Figure S9.** Spatial distribution of P contribution, T contribution and constant for each model in spring 2002-2014.
